# Supplementary material for: Organs-on-chips with integrated electrodes for trans-epithelial electrical resistance (TEER) measurements of human epithelial barrier function
Source: Royal Society of Chemistry journal article supplement (doi:10.1039/c7lc00155j), 2017-01-01
Supplement: c7lc00155j1.pdf [file c7lc00155j1.pdf]

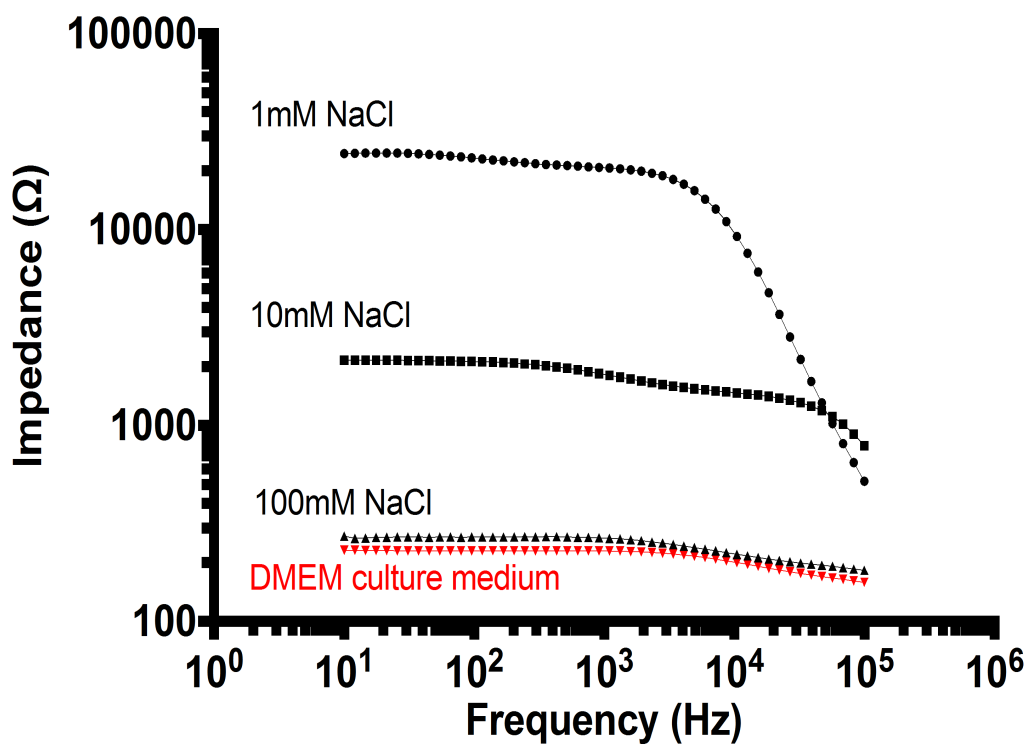

**Supplementary Figure S1** - Impedance response recorded for solutions of varying conductivity (DMEM culture medium versus 1, 10 or 100 mM NaCl).

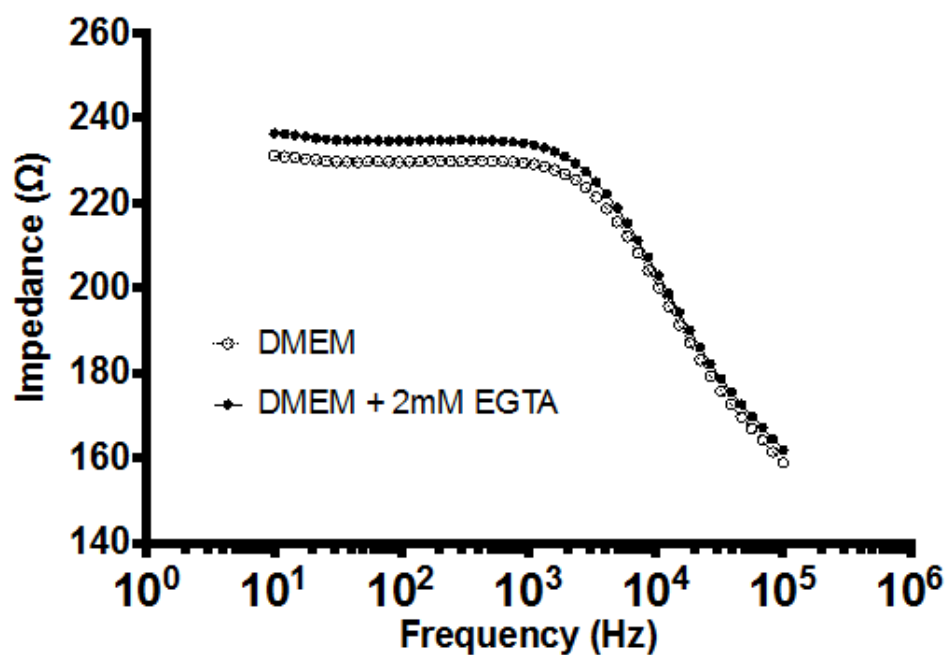

**Supplementary Figure S2** - Background electrochemical impedance spectroscopy in DMEM culture medium in the presence and absence of 2 mM EGTA.

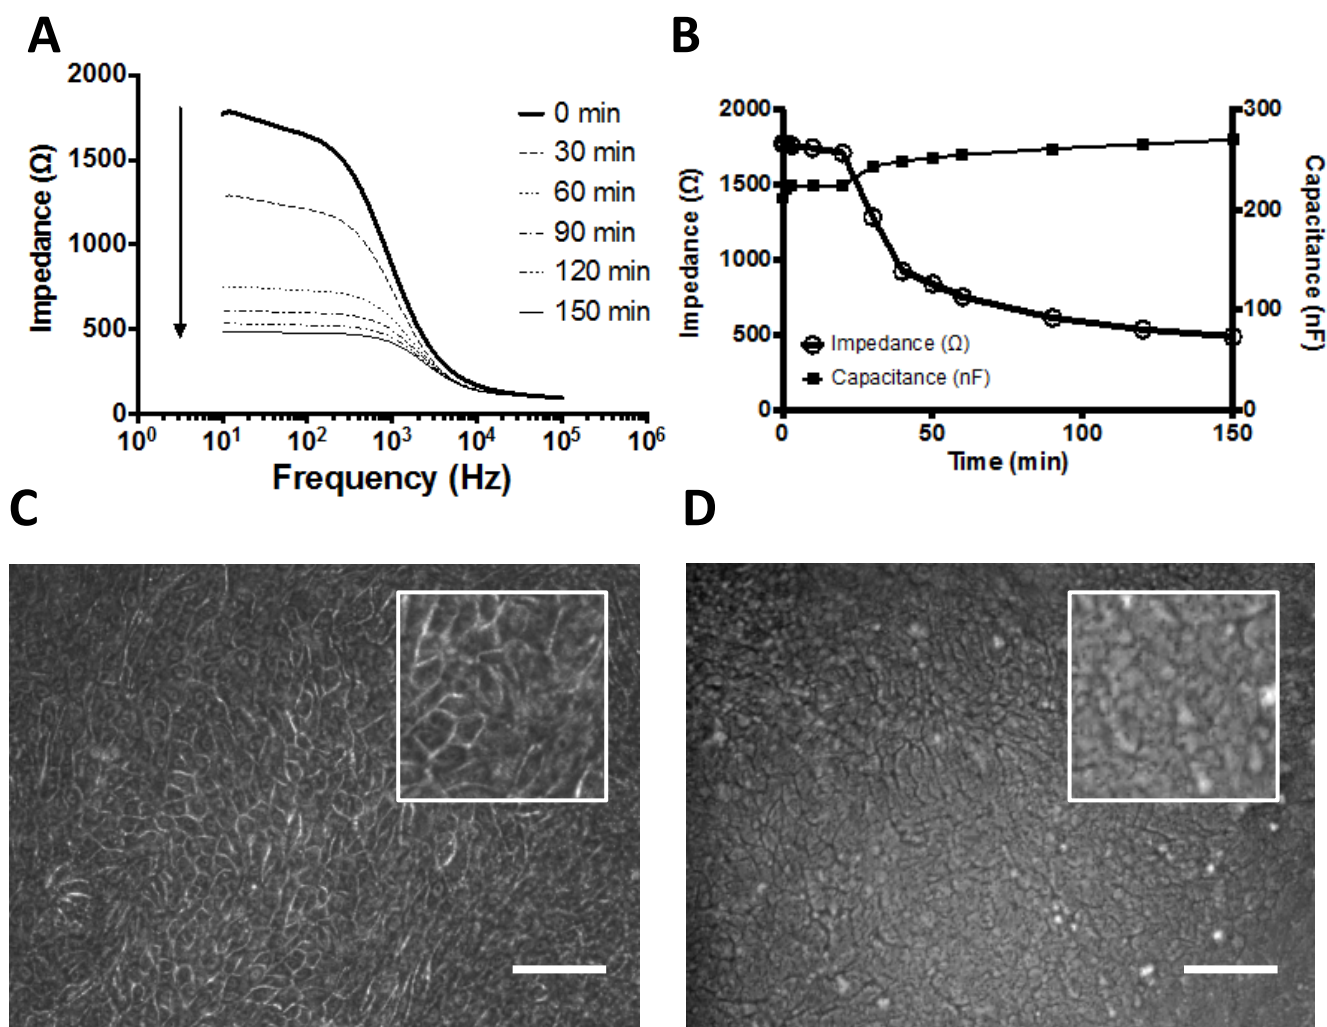

**Supplementary Figure S3 – A.** Overlay of impedance values recorded during exposure of the Airway-on-Chip to 2 mM EGTA at different time points post treatment (N=2 chips/condition). **B.** TEER and capacitance values extracted from **A.** recorded over the course of the experiment. Phase contrast image of well differentiated human primary airway epithelial cells (**C**) before and (**D**) after treatment with 2mM EGTA (original magnification, x20; scale bar: 100  $\mu$ m).
